# Supplementary material for: Reversal of CSF HIV-1 Escape during Treatment of HIV-Associated Cryptococcal Meningitis in Botswana
Source: MDPI journal article supplement (doi:10.3390/biomedicines10061399), 2022-06-13
Supplement: s1 [file s1]

**Table S1: Characteristics of Individuals with CSF viral escape at baseline**

| ID | Sex | Age<br>(Years) | Mental<br>Status | On<br>ART* | Duration<br>on ART<br>(months) | ART Regimen  | Baseline<br>CD4 count<br>(cells/ $\mu$ L) | Fungal<br>load<br>(CFU/mL) | CSF WCC<br>(cells/mm <sup>3</sup> ) | CSF<br>Glucose<br>(mmol/L) | CSF<br>Protein<br>(g/L) | Mortality<br>Outcome | CSF HIV-1<br>VL<br>(copies/ml) | Plasma<br>HIV-1 VL<br>(copies/ml) |
|----|-----|----------------|------------------|------------|--------------------------------|--------------|-------------------------------------------|----------------------------|-------------------------------------|----------------------------|-------------------------|----------------------|--------------------------------|-----------------------------------|
| 1  | M   | 40             | NORMAL           | Yes        | 3                              | TDF/3TC/DTG  | 87                                        | 165                        | 275                                 | 0.80                       | 3.65                    | Alive                | 1290                           | <60                               |
| 2  | F   | 34             | NORMAL           | No         | N/A                            | N/A          | 73                                        | 8300                       | 160                                 | 1.60                       | 1.65                    | Alive                | 526450                         | 137724                            |
| 3  | M   | 38             | NORMAL           | Yes        | 34                             | TDF/3TC/EFV  | 10                                        | 50                         | 10                                  | 2.70                       | 0.63                    | Alive                | 362670                         | 49275                             |
| 4  | M   | 31             | ABNORMAL         | N/A        | N/A                            | N/A          | N/A                                       | 2650000                    | 5                                   | 1.90                       | 0.97                    | Alive                | 736076                         | 127701                            |
| 5  | M   | 39             | NORMAL           | Yes        | 112                            | TDF/3TC/EFV  | 63                                        | 1465000                    | 130                                 | 1.60                       | 0.86                    | Alive                | 1129270                        | 119019                            |
| 6  | M   | 61             | NORMAL           | Yes        | 1                              | TDF/3TC/DTG  | N/A                                       | 15                         | 130                                 | 3.10                       | 1.19                    | Alive                | 4064                           | <60                               |
| 7  | M   | 44             | ABNORMAL         | N/A        | N/A                            | N/A          | N/A                                       | 45                         | 7                                   | 3.10                       | 1.10                    | Alive                | 3162300                        | 809064                            |
| 8  | M   | 34             | ABNORMAL         | N/A        | N/A                            | N/A          | N/A                                       | 8450                       | 8                                   | 2.60                       | N/A                     | Alive                | 3087332                        | 186726                            |
| 9  | F   | 56             | ABNORMAL         | Yes        | 0                              | TDF//3TC/DTG | N/A                                       | 31000                      | 70                                  | 1.70                       | 0.55                    | Alive                | 2524                           | 228                               |
| 10 | M   | 31             | NORMAL           | Yes        | 0                              | TDF//3TC/DTG | 84                                        | 41500                      | 8                                   | 2.10                       | 0.87                    | Alive                | 670                            | 120                               |
| 11 | F   | 24             | NORMAL           | N/A        | N/A                            | N/A          | 8                                         | 3750                       | 50                                  | 2.40                       | 1.08                    | Alive                | 2019112                        | 145347                            |
| 12 | F   | 34             | ABNORMAL         | Yes        | 18                             | TDF//3TC/DTG | 339                                       | 37500                      | 200                                 | 1.60                       | 2.30                    | Alive                | 753                            | <60                               |
| 13 | M   | 38             | NORMAL           | Yes        | 2                              | TDF//3TC/DTG | 190                                       | 10                         | 85                                  | 0.90                       | 1.63                    | Alive                | 38864                          | 3393                              |
| 14 | M   | 35             | ABNORMAL         | Yes        | 109                            | TDF/3TC/EFV  | 51                                        | 15                         | 145                                 | 1.00                       | 1.18                    | Alive                | 13200792                       | 2019123                           |
| 15 | F   | 33             | NORMAL           | N/A        | N/A                            | N/A          | 33                                        | 550000                     | 130                                 | 1.20                       | 1.49                    | Alive                | 4102696                        | 684588                            |
| 16 | M   | 44             | NORMAL           | N/A        | N/A                            | N/A          | N/A                                       | 750000                     | 5                                   | 3.10                       | 0.57                    | Alive                | 990370                         | 283332                            |
| 17 | M   | 41             | ABNORMAL         | N/A        | N/A                            | N/A          | 43                                        | 530000                     | 4                                   | 1.30                       | 0.76                    | Dead                 | 238140                         | 71499                             |
| 18 | F   | 50             | NORMAL           | Yes        | 0                              | TDF/3TC/DTG  | 295                                       | 20                         | 62                                  | 3.00                       | 0.52                    | Dead                 | 4730                           | 1143                              |
| 19 | F   | 41             | ABNORMAL         | No         | N/A                            | N/A          | N/A                                       | 153000                     | 10                                  | 3.30                       | N/A                     | Dead                 | 846132                         | 113559                            |
| 20 | M   | 31             | ABNORMAL         | Yes        | 0                              | TDF/3TC/EFV  | 127                                       | 70                         | 80                                  | 1.40                       | 2.10                    | Dead                 | 6356                           | 1566                              |

Abbreviations: 3TC, Lamivudine; ART, antiretroviral therapy; CFU, colony-forming units; CSF, cerebrospinal fluid; DTG, Dolutegravir; EFV, Efavirenz; F, female; IQR, interquartile range; M, male; N/A, not available or not applicable; TDF, Tenofovir Disoproxil Fumarate; WCC, white cell count. \*ART status is N/A because the individuals were newly diagnosed with HIV.
